# Supplementary material for: Syntheses and crystal structures of ethyltin complexes with ferrocenecarboxylic acid
Source: publisher site journal article supplement (doi:10.1515/mgmc-2022-0002), 2022-01-01
Supplement: Supplementary file 1 [file mgmc-2022-0002_sm.pdf]

## Research Article

Ruili Wang, Jing Zhang, Laijin Tian\*

# Syntheses and crystal structures of ethyltin complexes with ferrocenecarboxylic acid

## Supplementary material

**S1 IR of compounds 1–3:  $\text{Et}_2\text{Sn}(\text{OC}(\text{O})\text{Fc})_2$  (1),  $[(\text{Et}_2\text{SnOC}(\text{O})\text{Fc})_2\text{O}]_2$  (2), and  $[\text{EtSn}(\text{O})\text{OC}(\text{O})\text{Fc}]_6$  (3)**

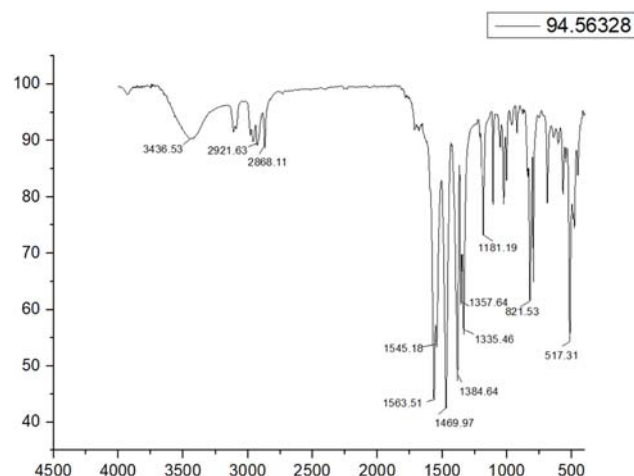

**Figure S1:** IR of compound 1 in KBr.

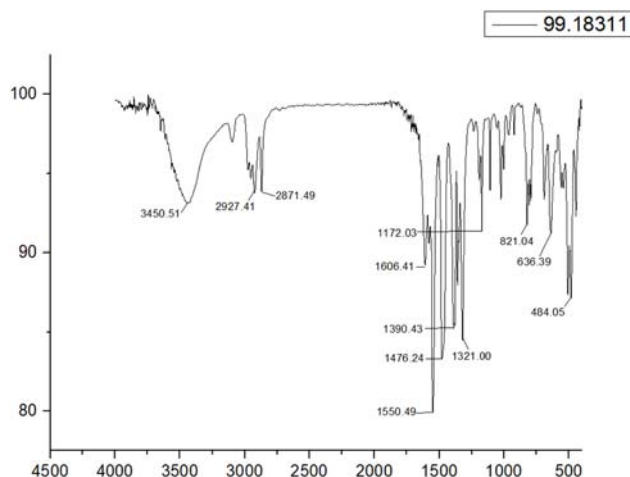

**Figure S2:** IR of compound 2 in KBr.

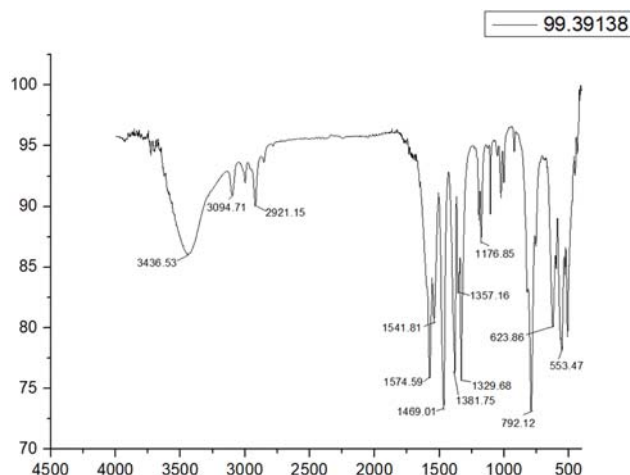

**Figure S3:** IR of compound 3 in KBr.

\* **Corresponding author: Laijin Tian**, Key Laboratory of Natural Products and Pharmaceutical Intermediates, Qufu Normal University, Qufu 273165, China, e-mail: lai jintian@163.com  
**Ruili Wang:** Key Laboratory of Natural Products and Pharmaceutical Intermediates, Qufu Normal University, Qufu 273165, China  
**Jing Zhang:** Experimental Center, Qufu Normal University, Qufu 273165, China

S2  $^1\text{H}$  NMR of compounds 1–3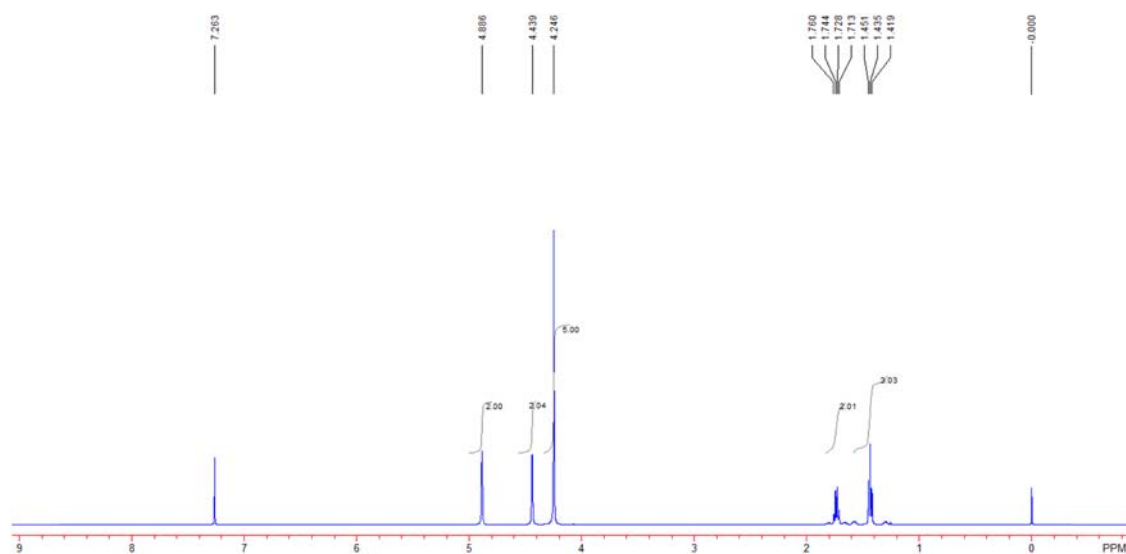Figure S4:  $^1\text{H}$  NMR of compound 1 in  $\text{CDCl}_3$ .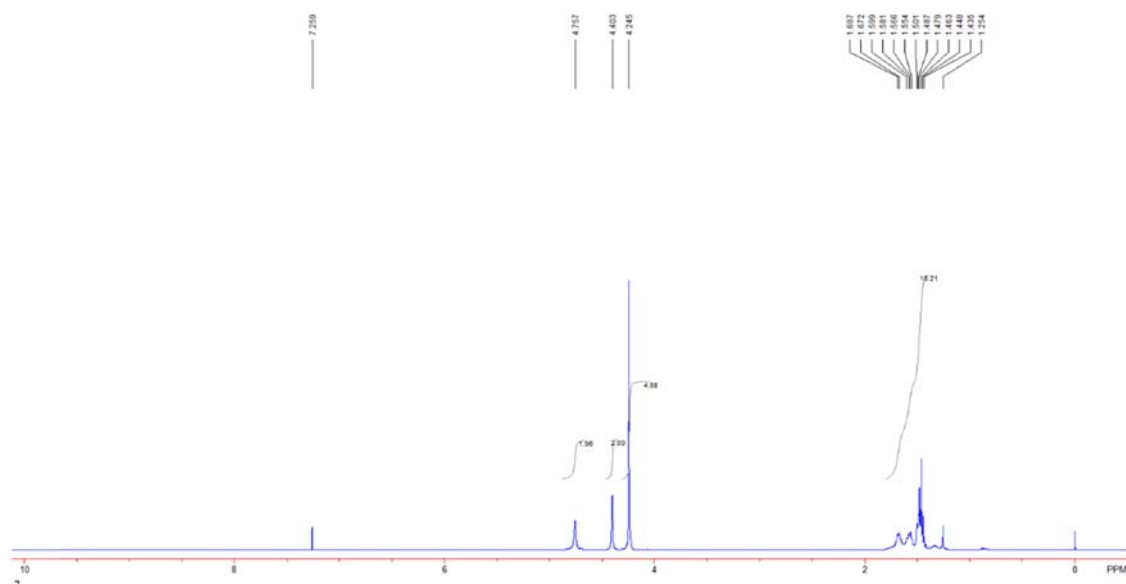Figure S5:  $^1\text{H}$  NMR of compound 2 in  $\text{CDCl}_3$ .

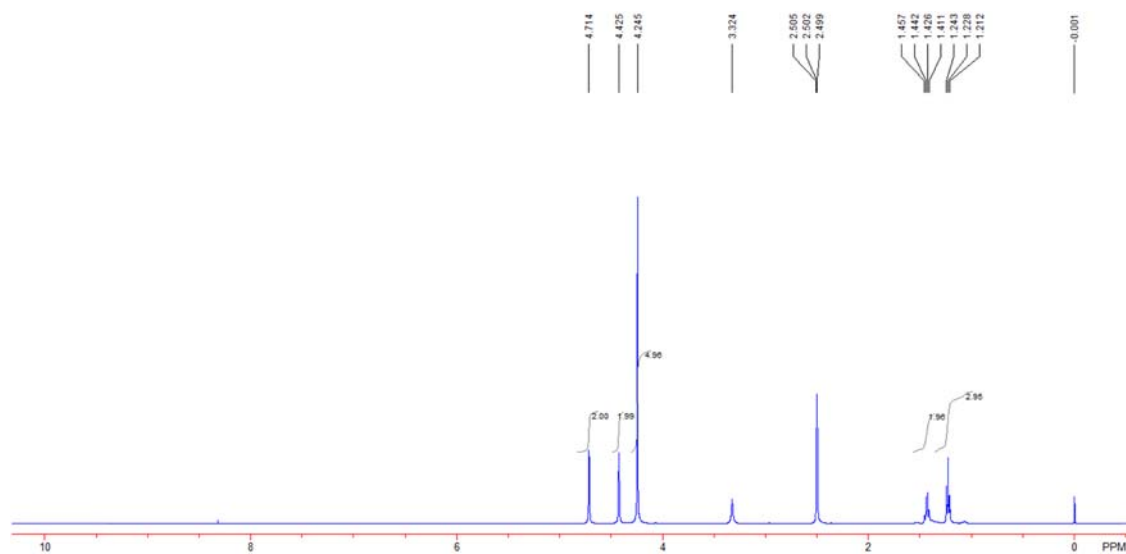

Figure S6:  $^1\text{H}$  NMR of compound **3** in  $\text{DMSO-}d_6$  (DMSO residual peak:  $\delta$  2.5,  $\text{H}_2\text{O}$ :  $\delta$  3.3).

### S3 $^{13}\text{C}$ NMR of compounds **1** and **2**

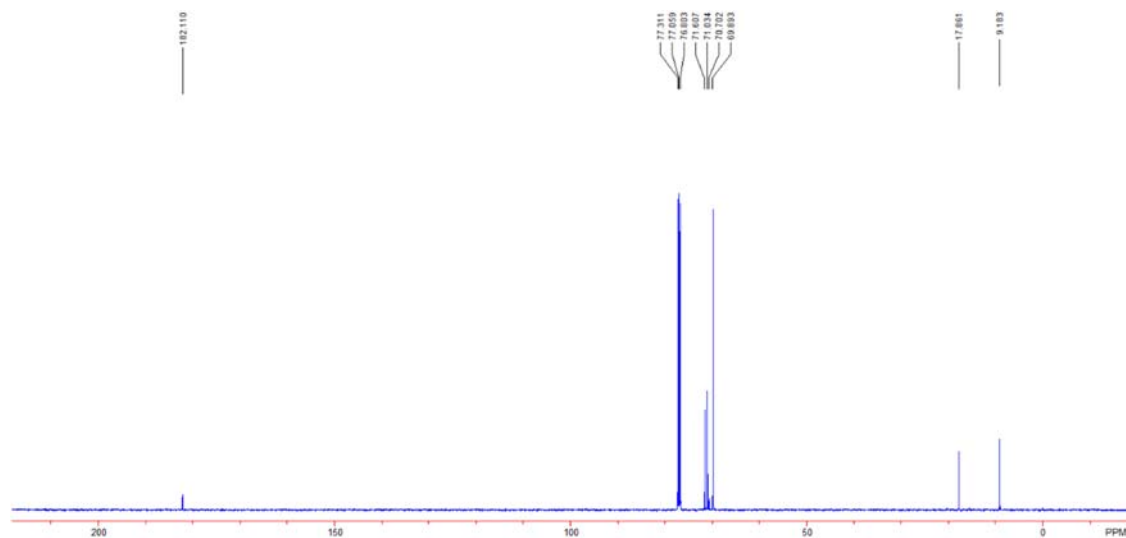

Figure S7:  $^{13}\text{C}$  NMR of compound **1** in  $\text{CDCl}_3$ .

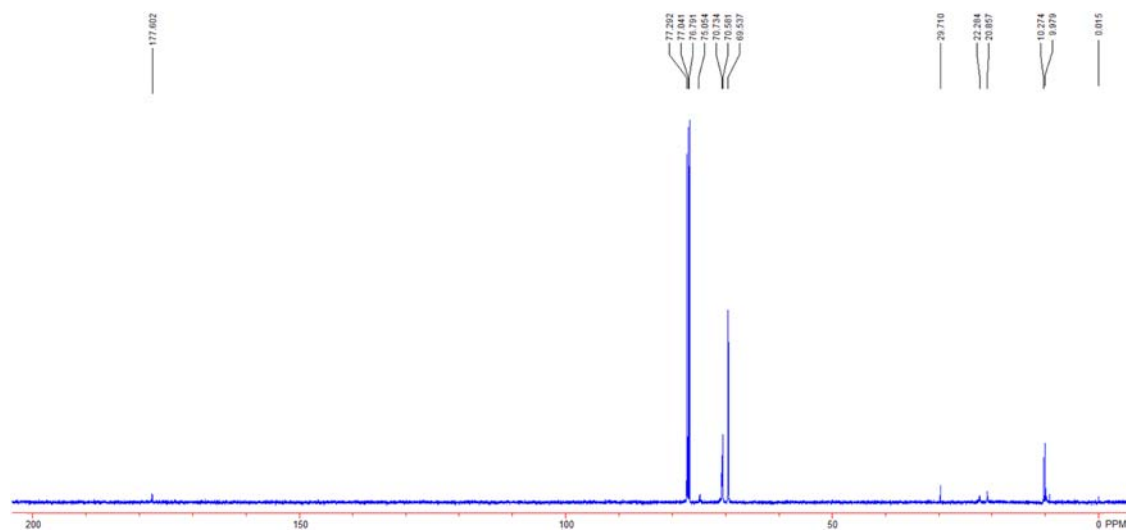

Figure S8: <sup>13</sup>C NMR of compound 2 in CDCl<sub>3</sub>.

#### S4 <sup>119</sup>Sn NMR of compounds 1 and 2

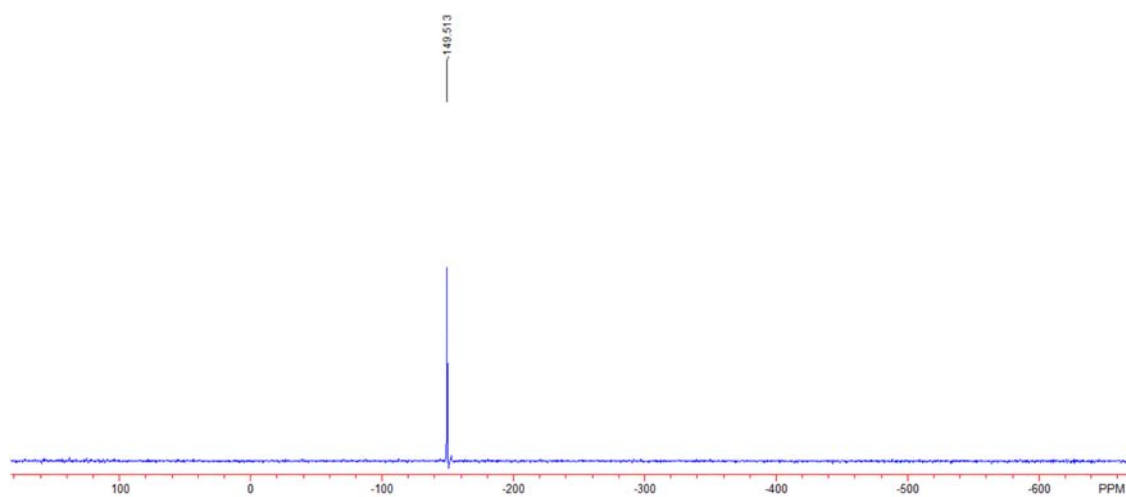

Figure S9: <sup>119</sup>Sn NMR of compound 1 in CDCl<sub>3</sub>.

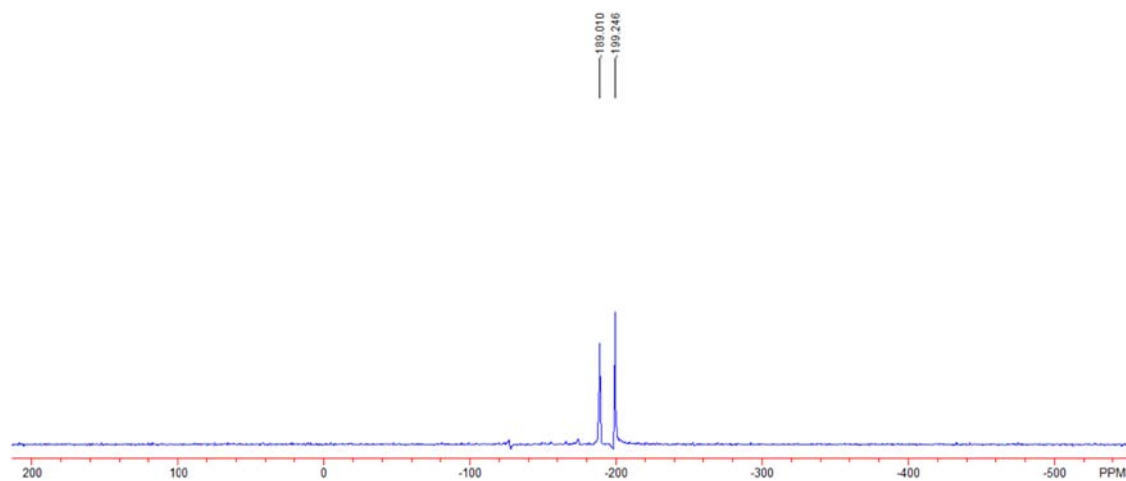

**Figure S10:**  $^{119}\text{Sn}$  NMR of compound 2 in  $\text{CDCl}_3$ .
